# Supplementary material for: Artemisia gmelinii Extract Attenuates Particulate Matter-Induced Neutrophilic Inflammation in a Mouse Model of Lung Injury
Source: MDPI journal article supplement (doi:10.3390/antiox12081591), 2023-08-09
Supplement: s1 [file s1]

**Supplementary Table S1.** Primers used for real-time quantitative PCR.

| Genes          |    | Sequences (5'-3')        |
|----------------|----|--------------------------|
| Hu_MPO         | F: | AGCAGGACAAATACCGCACCA    |
|                | R: | AGAGAAGCCGTCCTCATACTCC   |
| Hu_ELANE       | F: | TGCGCCCAACTTCGTCATGTCG   |
|                | R: | CGTAGCCGTTTTCGAAGATGCG   |
| Hu_DANSE1      | F: | CCAGACACCTATCACTACGTGG   |
|                | R: | CTCTCGGTTGAAGGTGTCGTTC   |
| Hu_PADI4       | F: | GCACAACATGGACTTCTACGTGG  |
|                | R: | CACGCTGTCTTGGAACACCACA   |
| Hu_IL1 $\beta$ | F: | CCACAGACCTTCCAGGAGAATG   |
|                | R: | GTGCAGTTCAGTGATCGTACAGG  |
| Hu_CXCR1       | F: | TCCTTTTCCGCCAGGCTTACCA   |
|                | R: | GGCACGATGAAGCCAAAGGTGT   |
| Hu_CXCR2       | F: | TCCGTCACTGATGTCTACCTGC   |
|                | R: | TCCTTCAGGAGTGAGACCACCT   |
| Hu_CXCR4       | F: | CTCCTCTTTGTCATCACGCTTCC  |
|                | R: | TCCTTCAGGAGTGAGACCACCT   |
| Hu_HMGB1       | F: | GGATGAGGACACTGCTGTAGAG   |
|                | R: | GTCCTTGAAGTTCTTTTTGGTCTC |
| Hu_RUNX1       | F: | CCACCTACCACAGAGCCATCAA   |
|                | R: | TTCACTGAGCCGCTCGGAAAAG   |
| Hu_KLF6        | F: | AACCAGGCACTCCGAAAGCAC    |
|                | R: | CTCAGAGGTGCCTCTTCATGTG   |
| Hu_ITGAL       | F: | CTGCTTTTGCCAGCCTCTCTGT   |
|                | R: | GCTCACAGGTATCTGGCTATGG   |
| Hu_CX3CR1      | F: | CACAAAGGAGCAGGCATGGAAG   |
|                | R: | CAGGTTCTCTGTAGACACAAGGC  |

## Supplementary Figure S1

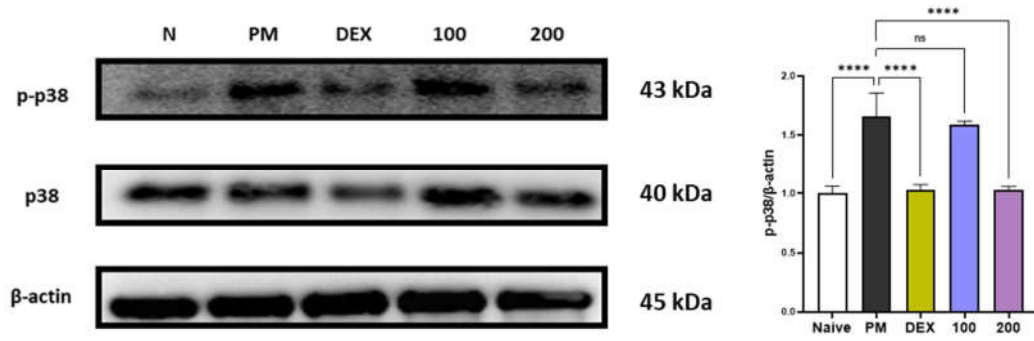

**Figure S1.** Effect of AGE on phosphorylation of p38 in the lung tissues. Protein expression levels of p-p38, p38, and  $\beta$ -actin. Data were analyzed using one-way ANOVA, followed by Dunnett's test. All values have been reported as mean  $\pm$  SD. \*  $p < 0.05$ , \*\*  $p < 0.01$ , \*\*\*  $p < 0.001$ , \*\*\*\*  $p < 0.0001$ .
